# Supplementary material
Source: Springer Nature journal article supplement (https://www.springermedizin.de/resource/supplementary/12883_2010_393_MOESM3_ESM.pdf/9455050)

pH 5

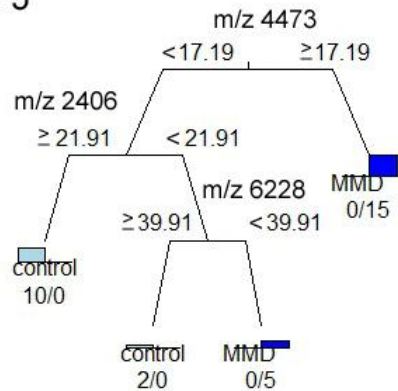

pH 7

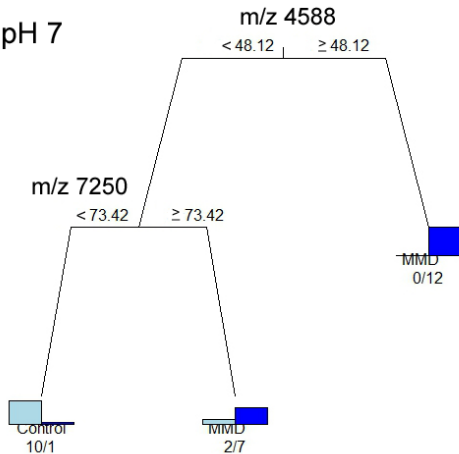

pH 9

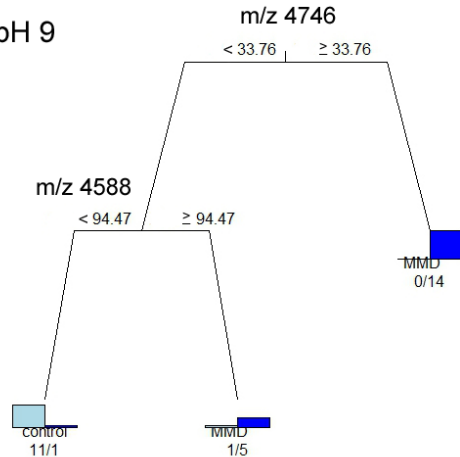

Supplement: MOESM3 [file 9455050]
